# Supplementary material for: The impact of the metabotropic glutamate receptor and other gene family interaction networks on autism
Source: PubMed Central journal article supplement (PMC4059929; doi:10.1038/ncomms5074), 2014-06-13
Supplement: ncomms5074-s1.pdf [file ncomms5074-s1.pdf]

**Supplementary Table 1:** Significant CNVRs in the mGluR network. The table shows the 10 most significant CNVRs for 189 genes with data in the GFIN for the GRM gene family across a European-derived population, as well as the most significant CNVRs harbored by the GRM mGluR receptors themselves.

| CNV                                                       | gene    | bands    | locus                     | Size (Kb) | # SNP | # Case | # Ctrl | P        | OR   |
|-----------------------------------------------------------|---------|----------|---------------------------|-----------|-------|--------|--------|----------|------|
| Most significant CNVRs within genes across the mGluR GFIN |         |          |                           |           |       |        |        |          |      |
| dup                                                       | CACNA1B | 9q34.3   | chr9:140767745-140774721  | 6.98      | 2     | 11     | 0      | 4.21E-04 | inf  |
| dup                                                       | CNR1    | 6q15     | chr6:88858724-88861698    | 2.98      | 1     | 15     | 8      | 9.39E-02 | 1.93 |
| dup                                                       | ECHS1   | 10q26.3  | chr10:135174203-135183094 | 8.89      | 2     | 10     | 0      | 8.54E-04 | inf  |
| dup                                                       | HOMER3  | 19p13.11 | chr19:19050957-19054720   | 3.76      | 2     | 9      | 3      | 6.68E-02 | 3.08 |
| del                                                       | PSMD1   | 2q37.1   | chr2:232025285-232035793  | 10.51     | 1     | 14     | 2      | 1.77E-03 | 7.20 |
| dup                                                       | RANBP1  | 22q11.21 | chr22:20107729-20117344   | 9.62      | 1     | 13     | 3      | 9.24E-03 | 4.46 |
| del                                                       | RYR2    | 1q43     | chr1:237273380-237275393  | 2.01      | 1     | 4      | 0      | 5.93E-02 | inf  |
| del                                                       | TJP1    | 15q13.1  | chr15:29812778-30178613   | 365.84    | 62    | 4      | 0      | 5.93E-02 | inf  |
| dup                                                       | TRAF2   | 9q34.3   | chr9:139776401-139821067  | 44.67     | 3     | 6      | 1      | 5.83E-02 | 6.16 |
| dup                                                       | TUBA3C  | 13q12.11 | chr13:19743860-19748709   | 4.85      | 4     | 17     | 8      | 4.70E-02 | 2.18 |
| Most significant CNVRs within GRM hubs of mGluR GFIN      |         |          |                           |           |       |        |        |          |      |
| del                                                       | GRM1    | 6q24.3   | chr6:146615383-146633818  | 18.44     | 3     | 2      | 0      | 2.44E-01 | inf  |
| del                                                       | GRM3    | 7q21.12  | chr7:86410689-86455535    | 44.85     | 9     | 1      | 0      | 4.94E-01 | inf  |
| del                                                       | GRM4    | 6p21.31  | chr6:33986091-34072561    | 86.47     | 26    | 0      | 1      | 1.00E+00 | -inf |
| del                                                       | GRM5    | 11q14.3  | chr11:88768276-88841459   | 73.18     | 7     | 4      | 0      | 5.96E-02 | inf  |
| dup                                                       | GRM6    | 5q35.3   | chr5:178313079-178547566  | 234.49    | 51    | 0      | 2      | 5.00E-01 | -inf |
| del                                                       | GRM7    | 3p26.1   | chr3:7169454-7197715      | 28.26     | 11    | 2      | 0      | 2.44E-01 | inf  |
| del                                                       | GRM8    | 7q31.33  | chr7:126405246-126457778  | 52.53     | 11    | 1      | 0      | 4.94E-01 | inf  |

**Supplementary Table 2:** Most significant CNVRs across genes in the MXD network in European-derived populations. Where large CNVs span multiple genes, the component gene implicated within the MXD gene family interaction network is **bolded**.

| CNV                                                       | gene(s)                                                                                                                                                                    | bands            | locus                    | Size (Kb) | # SNP | # Case | # Ctrl | P        | OR   |
|-----------------------------------------------------------|----------------------------------------------------------------------------------------------------------------------------------------------------------------------------|------------------|--------------------------|-----------|-------|--------|--------|----------|------|
| dup                                                       | SKI                                                                                                                                                                        | 1p36.33          | chr1:2204755-2211849     | 7.10      | 3     | 6      | 1      | 5.87E-02 | 6.15 |
| del                                                       | SMARCC1                                                                                                                                                                    | 3p21.31          | chr3:47749708-47749708   | 0.00      | 1     | 10     | 2      | 1.74E-02 | 5.13 |
| del                                                       | HDAC2                                                                                                                                                                      | 6q21             | chr6:114260720-114273646 | 12.93     | 5     | 4      | 0      | 5.96E-02 | inf  |
| del                                                       | HDAC9                                                                                                                                                                      | 7p21.1           | chr7:18375246-18384157   | 8.91      | 2     | 4      | 0      | 5.96E-02 | inf  |
| dup                                                       | PLEC <b>PARP10</b>                                                                                                                                                         | 8q24.3           | chr8:145046663-145059425 | 12.76     | 1     | 243    | 125    | 4.06E-11 | 2.04 |
| del                                                       | HDAC7                                                                                                                                                                      | 12q13.11         | chr12:48178513-48178604  | 0.09      | 2     | 7      | 1      | 3.26E-02 | 7.17 |
| dup                                                       | SNORD115-43 SNORD115-42<br><b>UBE3A</b> SNORD115-47<br>SNORD115-45 SNORD115-44<br>SNORD115-48 SNORD115-36<br>SNORD109A SNORD115-29<br>SNORD109B SNORD115-10<br>SNORD115-11 | 15q11.2          | chr15:25491630-25606727  | 115.10    | 11    | 19     | 0      | 1.50E-06 | inf  |
| del                                                       | <b>PML</b> STOML1                                                                                                                                                          | 15q24.1          | chr15:74247944-74343330  | 95.39     | 20    | 6      | 0      | 1.45E-02 | inf  |
| del                                                       | PTPN9 <b>SIN3A</b>                                                                                                                                                         | 15q24.2          | chr15:75718670-75806911  | 88.24     | 4     | 7      | 0      | 7.19E-03 | inf  |
| <b>Most significant CNVRs within MXD hubs of MXD GFIN</b> |                                                                                                                                                                            |                  |                          |           |       |        |        |          |      |
| del                                                       | SNRNP27 <b>MXD1</b>                                                                                                                                                        | 2p13.3           | chr2:70112581-70173629   | 61.05     | 10    | 1      | 0      | 4.94E-01 | inf  |
| dup                                                       | ZFYVE28 <b>MXD4</b>                                                                                                                                                        | 4p16.3           | chr4:2256717-2287420     | 30.70     | 4     | 2      | 0      | 2.44E-01 | inf  |
| del                                                       | GPRIN1 RAB24 MIR4281 HK3<br>UNC5A TSPAN17 SNCB<br>ZNF346 LMAN2 EIF4E1B<br>NSD1 PRELID1 FGFR4 <b>MXD3</b><br>UIMC1                                                          | 5q35.2<br>5q35.3 | chr5:176024881-176780544 | 755.66    | 95    | 1      | 0      | 4.94E-01 | inf  |

**Supplementary Table 3:** Most significant CNVRs across genes in the CALM1 network in European-derived populations.

| CNV | gene   | bands    | locus                    | Size (Kb) | # SNP | # Case | # Ctrl | P        | OR  |
|-----|--------|----------|--------------------------|-----------|-------|--------|--------|----------|-----|
| del | ADCY1  | 7p12.3   | chr7:45598469-45620959   | 22491     | 2     | 1      | 0      | 4.94E-01 | inf |
| dup | ADD1   | 4p16.3   | chr4:2906285-3080173     | 173889    | 28    | 3      | 0      | 1.21E-01 | inf |
| del | C4orf3 | 4q26     | chr4:120111190-120399505 | 288316    | 31    | 1      | 0      | 4.94E-01 | inf |
| dup | CALM1  | 14q32.11 | chr14:90843792-90868442  | 24651     | 4     | 2      | 0      | 2.44E-01 | inf |
| del | GLP1R  | 6p21.2   | chr6:39022698-39055516   | 32819     | 23    | 1      | 0      | 4.94E-01 | inf |
| dup | GLP2R  | 17p13.1  | chr17:9708956-9826778    | 117823    | 45    | 1      | 0      | 4.94E-01 | inf |
| dup | GRB7   | 17q12    | chr17:37834542-37922259  | 87718     | 2     | 1      | 0      | 4.94E-01 | inf |
| del | IQGAP2 | 5q13.3   | chr5:75795407-75805105   | 9699      | 4     | 1      | 0      | 4.94E-01 | inf |
| del | PDE1C  | 7p14.3   | chr7:32225283-32228302   | 3020      | 5     | 3      | 0      | 1.21E-01 | inf |
| del | PTH2R  | 2q34     | chr2:209280931-209297026 | 16096     | 4     | 0      | 1      | 1.00E+00 | 0   |
